# Supplementary material for: A Common 8q24 Variant in Prostate and Breast Cancer from a Large Nested Case-Control Study
Source: Oxford University Press journal article supplement (doi:10.1158/0008-5472.can-06-3591), 2007-04-01
Supplement: 00085472can063591-sup-supplementarytable2.pdf [file 00085472can063591-sup-supplementarytable2.pdf]

**Supplementary Table 2.** The genotypic association results between Gleason score at diagnosis and the *rs1447295* marker among Caucasian participants in the Breast and Prostate Cancer Cohort Consortium\*.

| Aggressiveness |    | Genotype | Cases (%)    | Controls (%) | OR <sup>†</sup> | 99% CI <sup>‡</sup> |                  | P-value <sup>§</sup>    |
|----------------|----|----------|--------------|--------------|-----------------|---------------------|------------------|-------------------------|
|                |    |          |              |              |                 | LCL <sup>‡</sup>    | UCL <sup>‡</sup> |                         |
| Gleason Score  | ≥8 | CC       | 208 (74.3)   | 4,005 (79.6) | Ref.            |                     |                  | 4.75 x 10 <sup>-3</sup> |
|                |    | AC       | 67 (23.9)    | 960 (19.1)   | 1.61            | 1.09                | 2.38             |                         |
|                |    | AA       | 5 (1.8)      | 64 (1.3)     | 2.10            | 0.60                | 7.37             |                         |
|                | 7  | CC       | 494 (75.4)   | 4,005 (79.6) | Ref.            |                     |                  | 5.90 x 10 <sup>-5</sup> |
|                |    | AC       | 149 (22.7)   | 960 (19.1)   | 1.54            | 1.18                | 2.03             |                         |
|                |    | AA       | 12 (1.8)     | 64 (1.3)     | 2.10            | 0.87                | 5.04             |                         |
|                | ≤6 | CC       | 1,195 (76.9) | 4,005 (79.6) | Ref.            |                     |                  | 2.82 x 10 <sup>-6</sup> |
|                |    | AC       | 332 (21.4)   | 960 (19.1)   | 1.44            | 1.18                | 1.76             |                         |
|                |    | AA       | 26 (1.7)     | 64 (1.3)     | 1.91            | 0.96                | 3.81             |                         |

\* Gleason score at diagnosis was missing for 3,473 cases (cases by cohort: 159 ACS-CPSII, 905 ATBC, 634 EPIC, 52 HPFS, 456 MEC, 168 PHS, 1,099 PLCO).

<sup>†</sup> Conditional logistic regression models were frequency adjusted for age in 5-year intervals, cohort and country.

<sup>‡</sup> 99% confidence intervals; lower and upper confidence limits.

<sup>§</sup> The p-value for association from a likelihood ratio test with two degrees-of-freedom.
